# Supplementary material for: Heat Waves and Adverse Health Events Among Dually Eligible Individuals 65 Years and Older
Source: PubMed Central journal article supplement (PMC11549656; doi:10.1001/jamahealthforum.2024.3884), 2024-11-08
Supplement: jamahealthforum-e243884-s001.pdf [file jamahealthforum-e243884-s001.pdf]

## Supplemental Online Content

Kim H, Yoo EH, Senders A, et al. Heat waves and adverse health events among dually eligible individuals 65 years and older. *JAMA Health Forum*. 2024;5(11):e243884.

doi:10.1001/jamahealthforum.2024.3884

**eFigure 1.** Local variation in heatwave days across ZCTAs within county boundaries in California

**eTable 1.** Data sources utilized in this study

**eAppendix 1.** Guide to R code

**eTable 2.** Study sample selection

**eAppendix 2.** Identification of outcomes

**eAppendix 3.** Model specification

**eFigure 2.** Nine climate regions by national centers of environmental information

**eAppendix 4.** Identification of subgroups

**eTable 3.** Type of service codes and place of service codes used to identify long-term service and supports (LTSS) use

**eAppendix 5.** Subgroup sample selection

**eTable 4.** Sample selection for subgroup analyses

**eTable 5.** Zip code tabulation area (ZCTA)-level descriptive statistics, 2016-2019

**eFigure 3.** Association between lagged heatwaves and adverse health events among dual-eligible enrollees, 2016-2019

### eReferences

This supplemental material has been provided by the authors to give readers additional information about their work.

eFigure 1. Local variation in heatwave days across ZCTAs within county boundaries in California

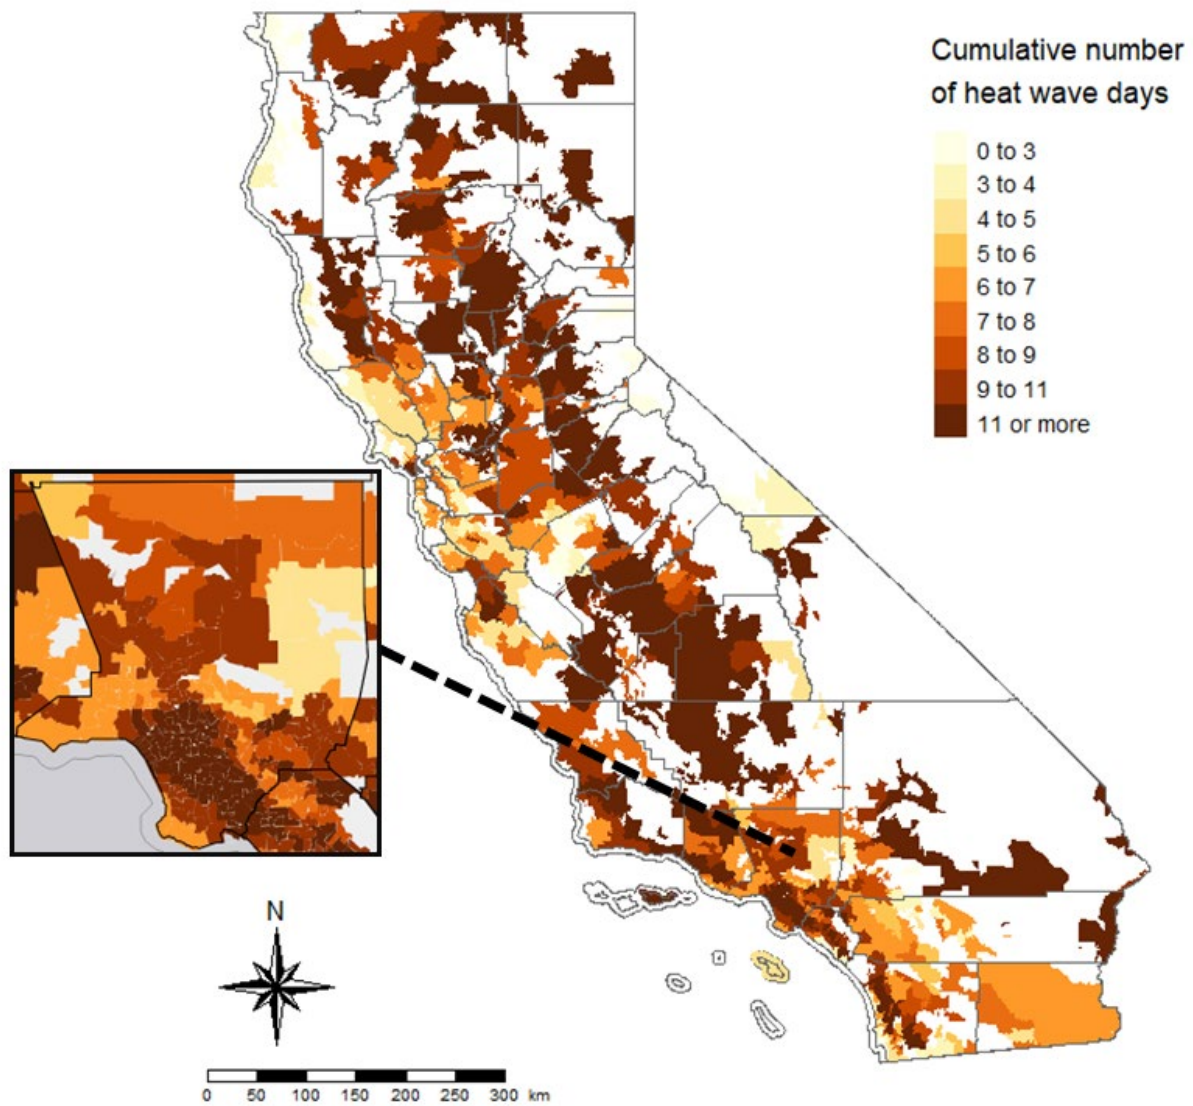

eTable 1. Data sources utilized in this study

| Source/Plan                                | Files                                                                                                  | Identification of:                                                                     | URL                                                                                                                                                                                                                |
|--------------------------------------------|--------------------------------------------------------------------------------------------------------|----------------------------------------------------------------------------------------|--------------------------------------------------------------------------------------------------------------------------------------------------------------------------------------------------------------------|
| Medicare FFS and MA (2016-2019)            | Master Beneficiary Summary File (Base)                                                                 | Enrollee age, sex, race, zip code, dual eligibility status, date of death              | <a href="https://resdac.org/cms-data/files/mbsf-base">https://resdac.org/cms-data/files/mbsf-base</a>                                                                                                              |
| Medicare FFS (2016-2019)                   | Master Beneficiary Summary Files (27 and 30 CCW Chronic Conditions Segment)                            | Alzheimer's and related dementias                                                      | <a href="https://resdac.org/cms-data/files/mbsf-27-cc">https://resdac.org/cms-data/files/mbsf-27-cc</a><br><a href="https://resdac.org/cms-data/files/mbsf-30-cc">https://resdac.org/cms-data/files/mbsf-30-cc</a> |
| Medicare FFS (2016-2019)                   | Master Beneficiary Summary Files (Other Chronic Conditions Segment)                                    | Substance use disorder (Alcohol use disorder, Opioid use disorder, Drug use disorders) | <a href="https://resdac.org/cms-data/files/mbsf-other-conditions">https://resdac.org/cms-data/files/mbsf-other-conditions</a>                                                                                      |
| Medicare FFS (2016-2019)                   | Inpatient, Outpatient, Carrier, Skilled Nursing Facility, and Home Health Agency Fee-for-Service files | Mental health diagnoses                                                                | <a href="https://resdac.org/cms-data?tid=1&amp;tid=5B4931%5D=4931">https://resdac.org/cms-data?tid=1&amp;tid=5B4931%5D=4931</a>                                                                                    |
| Medicare MA (2016-2019)                    | Inpatient, Outpatient, Carrier, Skilled Nursing Facility, and Home Health Agency Encounter files       | Dementia, substance use disorder, and mental health diagnoses                          | <a href="https://resdac.org/cms-data?tid=1&amp;tid=5B6056%5D=6056">https://resdac.org/cms-data?tid=1&amp;tid=5B6056%5D=6056</a>                                                                                    |
| Medicare FFS (2016-2019)                   | MedPAR                                                                                                 | Hospitalizations and emergency department visits                                       | <a href="https://resdac.org/cms-data/files/medpar">https://resdac.org/cms-data/files/medpar</a>                                                                                                                    |
| Medicare MA (2016-2019)                    | Inpatient (Encounter)                                                                                  | Hospitalizations and emergency department visits                                       | <a href="https://resdac.org/cms-data/files/ip-encounter">https://resdac.org/cms-data/files/ip-encounter</a>                                                                                                        |
| Medicare FFS (2016-2019)                   | Outpatient (Fee-for-Service)                                                                           | Emergency department visits                                                            | <a href="https://resdac.org/cms-data/files/op-ffs">https://resdac.org/cms-data/files/op-ffs</a>                                                                                                                    |
| Medicare MA (2016-2019)                    | Outpatient (Encounter)                                                                                 | Emergency department visits                                                            | <a href="https://resdac.org/cms-data/files/op-encounter">https://resdac.org/cms-data/files/op-encounter</a>                                                                                                        |
| Medicaid T-MSIS Analytic Files (2016-2019) | Demographic and Eligibility Base File                                                                  | Dual-eligibility, zip code                                                             | <a href="https://resdac.org/cms-data/files/taf-de">https://resdac.org/cms-data/files/taf-de</a>                                                                                                                    |
|                                            | Other Services File                                                                                    | HCBS utilization, substance use disorder, and mental health diagnoses                  | <a href="https://resdac.org/cms-data/files/taf-ot">https://resdac.org/cms-data/files/taf-ot</a>                                                                                                                    |
|                                            | Long Term Care File                                                                                    | Nursing facility utilization                                                           | <a href="https://resdac.org/cms-data/files/taf-lt">https://resdac.org/cms-data/files/taf-lt</a>                                                                                                                    |

|                                                          |                                                                                   |                                                                                   |                                                                                                                                                                       |
|----------------------------------------------------------|-----------------------------------------------------------------------------------|-----------------------------------------------------------------------------------|-----------------------------------------------------------------------------------------------------------------------------------------------------------------------|
|                                                          | Inpatient File                                                                    | Nursing facility utilization, substance use disorder, and mental health diagnoses | <a href="https://resdac.org/cms-data/files/taf-lt">https://resdac.org/cms-data/files/taf-lt</a>                                                                       |
| Oak Ridge National Laboratory Distributed Active Archive | Daymet: Daily Surface Weather Data on a 1-km grid for North America, Version 4 R1 | Vapor pressure, maximum and minimum daily temp                                    | <a href="https://daac.ornl.gov/about/">https://daac.ornl.gov/about/</a>                                                                                               |
| Robert Graham Center (2016)                              | Social Deprivation Index at the ZCTA level                                        | Social deprivation index score                                                    | <a href="https://www.graham-center.org/maps-data-tools/social-deprivation-index.html">https://www.graham-center.org/maps-data-tools/social-deprivation-index.html</a> |

## eAppendix 1. Guide to R code

### *Overview*

Sample R code to calculate average daily weather variables by ZCTA and to flag heatwave days is included in the supplemental material for this manuscript. The code was developed for parallel processing but could be adapted if parallel processing is not available.

### *Presumed Directory Structure*

Our code presumes that daily weather files are stored in a single directory, and that US state and ZCTA shape files are each saved in separate directories. Shape files are available from [www.census.gov](http://www.census.gov).

### *Final Data structure*

Together, the following scripts produce a single table that includes one row per ZCTA-year. The table contains columns for daily average maximum temperature, daily average minimum temperature, daily average relative humidity, ZCTA-level 90<sup>th</sup> and 97<sup>th</sup> percentile maximum temperature and minimum temperature thresholds, and a daily heatwave indicator.

### *R scripts*

#### *1\_climate\_data\_by\_zcta.R*

This script calculates average daily weather variables by ZCTA for the continental US during warm months (May 1<sup>st</sup> through September 30<sup>th</sup>). To reduce processing time, this code processes one weather variable (e.g., max temperature) for one state during one year at a time. A separate table for each weather variable/state/year is saved into a single directory and bound in the next script.

#### *2\_bind\_climate\_vars\_years.R*

This script binds the yearly tables saved by the previous script into a single table for each weather variable by state. Care should be taken to make sure the list of states is complete and does not include any states that were not processed in the first script.

#### *3\_calculate\_rh\_flag\_heat\_waves.R*

This script merges the weather variable tables saved by the previous step into a single table for each state. It then calculates daily average maximum and minimum temperatures and relative humidity. We used the `esat()` function from the `plantecophys` package to calculate relative humidity. The code then calculates the 90<sup>th</sup> and 97<sup>th</sup> percentile maximum and minimum temperatures for each ZCTA using all days (May 1<sup>st</sup> – September 30<sup>th</sup>) across all years. Finally, this script creates a heatwave flag. It uses a function that is stored in a separate R script to flag all ZCTA-days that meet the definition of a heatwave day.

### *FlagHeatWave\_Function.R*

This script creates a function to flag heatwaves. It takes any of the heatwave threshold temperature columns as arguments, and then uses them to create heatwave flags for maximum or minimum temperatures. The function flags each day as being part of a heatwave (flag = 1) or not part of a heatwave (flag = 0)

The function takes four arguments:

- table - The table to flag heatwaves in. In our heatwave scripts, the table is called *state\_temps*.
- days - Can be 2, 3, or 4 to flag heatwaves that are 2, 3, or 4 consecutive days above the threshold temperature.
- max\_min – “tmax” if creating indicators for daily maximum temperature heatwaves, “tmin” if creating indicators for daily minimum temperature indicators.
- threshold - The column name where the threshold temps are located.
- flag\_name - The name you want for the column that will store the heatwave flags. The function will append the day of the year to the end of the flag name.

Example: To create a heatwave flag in a column called "hw\_flag\_max\_97\_3\_day\_xxx" for heatwaves that are 3 days long, using the 97<sup>th</sup> percentile maximum temperature (stored in a column called "hw\_max\_97"), in a table called "temps", the function call would be written:

```
new_table <- hw_flag(table = temps, days = 3, max_min = "tmax", threshold = "hw_max_99", flag_name = "hw_flag_max_99_3_day_")
```

### *4\_bind\_states*

This script binds the state-level tables of weather variables and heatwave indicators to produce a single table that includes data for all states. This is the final script in the weather variable and heatwave indicator pipeline.

eTable 2. Study sample selection

| <b>Sample selection step</b>                               | <b>Enrollees<br/>(N)</b> | <b>Change<br/>(N)</b> | <b>Change<br/>(%)</b> |
|------------------------------------------------------------|--------------------------|-----------------------|-----------------------|
| Age 65+, fully enrolled and dually eligible May-Sept       | 6,279,148                |                       |                       |
| Exclude enrollees living in US territories                 | 6,273,667                | -5,481                | 0.1%                  |
| Restrict to enrollees living in the same county May-Sept   | 6,233,705                | -39,962               | 0.6%                  |
| Restrict to matching Medicaid ZCTA/dual-eligibility status | 5,508,570                | -725,135              | 11.6%                 |
| Restrict to ZCTAs with $\geq 1$ enrollee during 2016-2019  | 5,448,499                | -60,071               | 1.1%                  |

## eAppendix 2. Identification of outcomes

### Number of all-cause emergency department (ED) visits

Records for ED visits that result in an inpatient admission are found in the MedPAR and Medicare Inpatient Encounter files, otherwise ED visit claims are located in the Outpatient Fee-for-Service and Outpatient Encounter files. We identified ED visits with revenue center code (REV\_CNTR) values of 0450-0459 (emergency room) or 0981 (professional fees-emergency room).

### Number of all-cause hospitalizations

We used 2016 HEDIS specifications to identify hospitalizations (Inpatient Utilization—General Hospital/Acute Care).<sup>1</sup> Because MedPAR files lack claim-line variables (e.g. revenue center codes, facility type, etc.), we modified HEDIS specifications to identify acute fee-for-service hospitalization claims with the following criteria:

- Inpatient stay (CLM\_TYPE\_CD of 60 or 61) with a short stay provider indicator code (SSLSSNF = S)
- Inpatient stay (CLM\_TYPE\_CD of 60 or 61) in a critical access hospital (3<sup>rd</sup> and 4<sup>th</sup> digit of PRVDR\_NUM = 13)

### Heat-related ED visits and hospitalizations

We further classified ED visits and hospitalizations as heat-related if any of the following diagnosis codes were found in any position on a claim for the encounter: volume depletion (E86), electrolyte imbalance (E87), effects of heat and light (T67), exposure to excessive heat (X30), or exposure to sunlight (X32).<sup>2,3</sup>

### Heat-specific ED visits and hospitalizations

We classified ED visits and hospitalizations as heat-specific if any of the following diagnosis codes were found in any position on a claim for the encounter: effects of heat and light (T67), exposure to excessive heat (X30), or exposure to sunlight (X32).<sup>2</sup>

### New nursing facility placement

We defined nursing facility placements as any nursing facility use (as defined above) among enrollees who did not have any nursing facility use in the previous calendar year.

### Deaths

We identified deaths using the enrollee DEATH\_DT in the Medicare Master Beneficiary Summary File.



### eAppendix 3. Model specification

For all outcomes, we used the following Poisson model specification:

$$\log\left(\frac{Y_{id}}{n_{id}}\right) = \mu + \beta \text{Heatwave}_{id} + \theta X_{id} + \alpha_i$$

where  $Y_{id}$  is the outcome for ZCTA  $i$  on day  $d$  (taking place May-September, 2016-2019), offset for the size of the ZCTA's population on that day  $n_{id}$ .  $\text{Heatwave}_{id}$  is a vector of indicators for whether the day  $d$  was a heatwave day or not, and  $\beta$  is the corresponding vector of coefficients.  $X_{id}$  is a vector of time-varying independent variables (daily relative humidity; annual proportion of ZCTA that is female; proportion of ZCTA that is aged 65-74, 75-84, or 85+; and indicators for day of the week (Sunday-Saturday), week-year of the study period, and federal holidays), and  $\theta$  is the corresponding vector of coefficients. Finally,  $\alpha_i$  are the ZCTA fixed effects. We clustered standard errors at the ZCTA level and calculated confidence intervals using the delta method.<sup>4</sup>

eFigure 2. Nine climate regions by national centers of environmental information

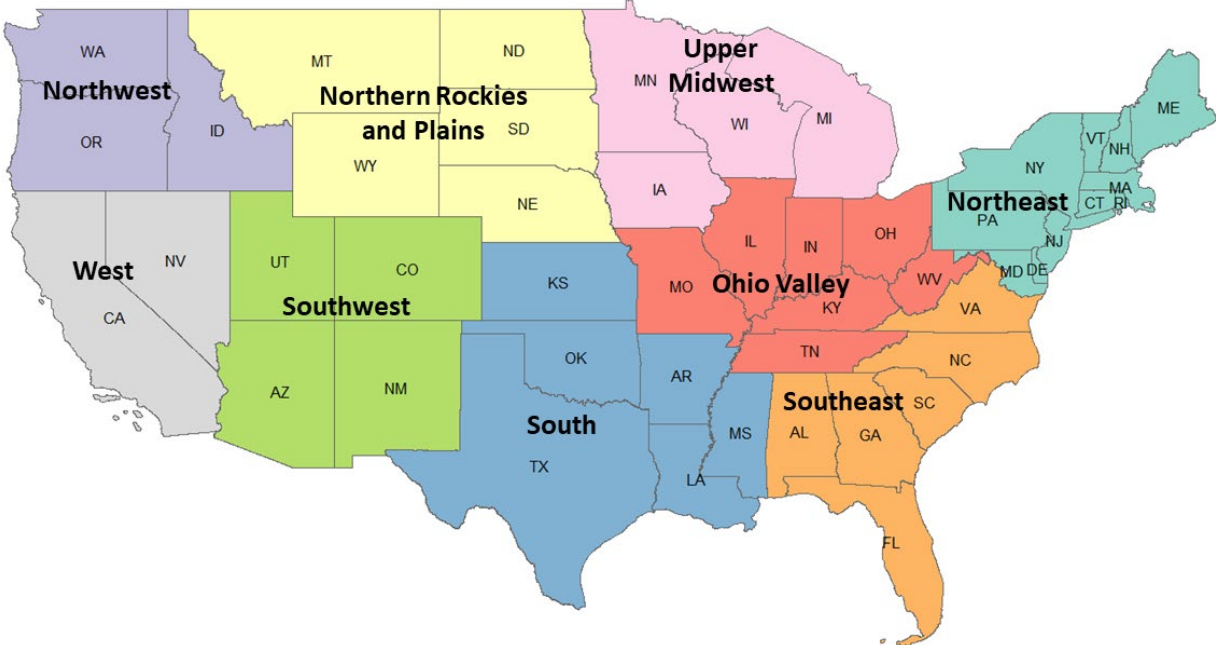

## eAppendix 4. Identification of subgroups

### Alzheimer's disease and related dementias (ADRD)

We created a binary variable for whether an enrollee had claims for ADRD prior to the start of each study year (yes/no). For enrollees with Medicare fee-for-service in 2016 or 2017, we used chronic condition flags published by the Chronic Conditions Warehouse (CCW 27) to identify the presence of ADRD at the end of 2015 and 2016, respectively (yes/no). For enrollees in 2018 or 2019, we used the revised CCW 30 flags to identify the presence of ADRD at the end of 2017 and 2018, respectively.

CCW flags are not available for Medicare Advantage. For enrollees in this program we used the CCW 30 algorithm to identify ADRD using Medicare Advantage claims. Because the algorithm requires a two-year lookback, we could only include Medicare Advantage enrollees in 2018 or 2019 in the ADRD sub-analysis.

Because a high proportion of individuals with ADRD reside in nursing facilities with interior temperature control, we restricted this analysis to community dwelling individuals with and without ADRD. To accurately identify community dwelling individuals, we also excluded individuals who lived in five states with potentially unreliable nursing facility claims data per the DQ Atlas (AR, ID, MS, NH, and RI).<sup>5</sup>

### Mental health diagnosis

We created a categorical variable for mental health status (none, mild-to-moderate, or severe mental illness). To identify enrollees in Medicare fee-for-service and Medicare Advantage with a mental health condition prior to each study year, we first used the Agency for Healthcare Research and Quality's Clinical Classifications Software Refined (CCSR) to identify a broad list of mental health diagnostic codes.<sup>6</sup> We began with all ICD-10 codes included in the CCSR body system "Mental, Behavioral, and Neurodevelopmental Disorders". We then excluded codes related to a physiologic condition, substance use, or childhood condition. Our final set of ICD-10 codes included F20-69 and F90-99 (including subcategory codes and excluding F55, F64.2, F93, F94.8, F94.9, and F98), as well as all the codes in the CCSR Category MBD012 "Suicidal ideation/attempt/intentional self-harm".

We defined enrollees with severe mental illness (SMI) as those with at least 1 inpatient claim OR 2 other non-drug claims of any service type over a two-year period with any diagnosis of schizophrenia (F20, F25), bipolar I (F30, F31.0-F31.78), or major depressive disorder (F32.2, F32.3, F33.2, F33.3).

We defined enrollees with a mild-to-moderate mental health diagnosis as those with at least 1 inpatient claim OR 2 other non-drug claims of any service type over a two-year period with any mental health diagnosis code that did not fall under our definition of SMI.

Enrollees who did not meet the criteria for SMI or a mild-to-moderate diagnosis were categorized as “none”. Because our algorithms require a two-year lookback, we could only include enrollees in 2018 or 2019 in the mental health sub-analysis.

### Race and ethnicity

There are six categories of race and ethnicity available in Medicare data: American Indian/Alaska Native, Asian/Pacific Islander, Black, Hispanic, non-Hispanic white, and Other. An enrollee’s race/ethnicity is identified from information used by the Social Security Administration and an algorithm developed by the Research Triangle Institute (RTI), which determines whether enrollee names are likely Asian or Hispanic in origin.<sup>7</sup> The RTI race code has high sensitivity and specificity compared to self-reported race and ethnicity.<sup>8</sup> When we restricted to ZCTAs with at least 1 enrollee in each racial/ethnic subgroup in each year 2016-2019, small sample sizes limited our final subgroup analysis to individuals who were identified as Asian/Pacific Islander, Black, Hispanic, and non-Hispanic white.

### Region

We categorized ZCTAs into nine climatically consistent US regions: Northeast, Northern Rockies and Plains, Northwest, Ohio Valley, South, Southeast, Southwest, Upper Midwest, West.<sup>9,10</sup>

### Rurality

We used 2010 Rural-Urban Commuting Area (RUCA) codes to categorize ZCTAs as urban (1.0, 1.1, 2.0, 2.1, 3.0, 4.1, 5.1, 7.1, 8.1, 10.1) or rural (4.0, 4.2, 5.0, 5.2, 6.0, 6.1, 7.0, 7.2, 7.3, 7.4, 8.0, 8.2, 8.3, 8.4, 9.0, 9.1, 9.2, 10.0, 10.2, 10.3, 10.4, 10.5, 10.6).<sup>11</sup>

### Social deprivation index (SDI) score

We created a binary variable of social deprivation based on the 2016 ZCTA-level SDI score.<sup>12</sup> We assigned each ZCTA a SDI score and then categorized each ZCTA as either above (higher social deprivation) or below (lower social deprivation) the sample median.

### Substance use disorder (SUD)

We created a binary variable for whether an enrollee had claims for SUD prior to the start of each study year (yes/no). Both Medicare and Medicaid cover behavioral health services for dually eligible individuals. Therefore, we used both Medicare and Medicaid claims to identify the presence of SUD in

our analytic cohort. We used a combination of the CCW Other Chronic Condition algorithms for Alcohol Use Disorders, Drug Use Disorders, and Opioid Use Disorder #1 to identify the presence of SUD in Medicare fee-for-service and Medicare Advantage enrollees.<sup>13</sup> Because the algorithms require a two-year lookback, we could only include enrollees in 2018 or 2019 in the SUD sub-analysis.

### Long-term Services Supports (LTSS)

We created a categorical variable for LTSS use (none, HCBS, or nursing facility resident) in a given study year.

To identify HCBS users, we followed the methodological guidance for *Identifying Home and Community-Based Services and the Enrollees Who Use Them in the TAF* published by CMS.<sup>14</sup> Step three in the five-step process instructs researchers to use type of service codes (TOS\_CD) to identify HCBS claims but is not prescriptive about which codes should be employed. The TOS\_CDs used to identify HCBS in this study are presented in eTable 3. Because this method of identifying HCBS use relies most heavily on procedure codes and type of service codes in the TAF Other Services File, we replicated DQ Atlas data quality assessments for these two variables for all dual eligible individuals from 2016-2019. In any given study year, all states had  $\leq 10\%$  missing procedure codes or type of service codes. We therefore did not exclude any states from the LTSS subgroup analysis based on these criteria.

We used two methods to identify enrollees who resided in a nursing facility during May-September of a given year. First, we used a combination of type of service code (TOS\_CD) and service dates (SRVC\_BGN\_DT, SRVC\_END\_DT) on claims in the Long-Term Care Analytic Files to identify nursing facility claims. We used the following type of service codes to identify nursing facility stays: 009, 045-047, 059. We used the Claim Beginning Date of Service (SRVC\_BGN\_DT) and the Claim Ending Date of Service (SRVC\_END\_DT) to calculate the length of nursing facility stays. We chose not to use discharge dates on long-term care claims due to data quality issues documented by the Center for Medicaid and CHIP Services.<sup>5</sup> For each enrollee we grouped claims with consecutive or overlapping dates of service into nursing facility encounters. We defined nursing facility residents as individuals with nursing facility encounters from at least May-September in a given year with no more than a 10-day gap.

Second, we followed methodology published by CMS that is used to assign a service category variable to TAF claims. Beginning with the 2021 data release, this federally assigned service category (FASC) variable is meant to provide users with an alternative method to identify and select records for services that tend to be reported inconsistently across states. We identified nursing facility claims by applying the algorithm outlined in CMS Methodology Brief #5241 Appendix A for FASC category 6 (Nursing Facility).<sup>15</sup> We then

grouped claims for each enrollee into encounters as described above. Enrollees who met our criteria for nursing facility resident under either approach were categorized as a nursing facility resident.

We replicated DQ Atlas data quality assessments for type of service codes in the TAF Long-term File for all dual eligible individuals from 2016-2019. In any given study year, all states had  $\leq 10\%$  missing type of service codes. For this sub-analysis we also excluded five states that DQ Atlas has flagged for having lower long-term claims volume than expected (AR, ID, MS, NH, RI).

eTable 3. Type of service codes and place of service codes used to identify long-term service and supports (LTSS) use

| Type of LTSS     | Type of Service Codes                                                                                                                                               | Place of Service Codes             |
|------------------|---------------------------------------------------------------------------------------------------------------------------------------------------------------------|------------------------------------|
| Nursing Facility | 009, 045-047, 059                                                                                                                                                   | Not applicable                     |
| HCBS             | 016, 017, 018, 019, 020, 021, 043, 051, 053, 062, 063, 064, 065, 066, 067, 068, 069, 070, 071, 072, 073, 074, 075, 076, 077, 078, 079, 080, 081, 082, 083, 115, 144 | Any POS_CD                         |
|                  | 054                                                                                                                                                                 | 04, 12, 13, 14, 16, 33, 34, 55, 56 |
|                  | 022                                                                                                                                                                 | 04, 12, 13, 14, 16, 33, 34, 55, 56 |

## eAppendix 5. Subgroup sample selection

We used the same study sample criteria from our main analysis to identify each of our subgroup study samples, with two exceptions. After restricting the sample to those with matching Medicare/Medicaid ZCTA and dual eligibility status, we excluded enrollees in years that we could not include for that particular analysis due to data limitations (see Subgroup Identification for ADRD, Mental health, and SUD). We then restricted to ZCTAs with at least 1 enrollee in each subgroup strata between 2016-2019 (eTable 4).

eTable 4. Sample selection for subgroup analyses

| Analysis                                                | Selection step                                 | Enrollees (N) | Change (N) | Change (%) | Excluded states    |
|---------------------------------------------------------|------------------------------------------------|---------------|------------|------------|--------------------|
| <i>Common selection steps for all analyses</i>          |                                                |               |            |            |                    |
|                                                         | Fully enrolled duals May-Sept                  | 6,279,148     |            |            |                    |
|                                                         | Exclude enrollees living in US territories     | 6,273,667     | -5,481     | 0.1%       |                    |
|                                                         | Restrict to same Medicare county May-Sept      | 6,233,705     | -39,962    | 0.6%       |                    |
|                                                         | Restrict to matching Medicaid ZCTA/dual status | 5,508,570     | -725,135   | 11.6%      |                    |
| <i>Additional selection steps based on sub-analysis</i> |                                                |               |            |            |                    |
| ADRD                                                    | Exclude MA enrollees in 2016-2017              | 5,080,404     | -428,166   | 7.8%       |                    |
|                                                         | Exclude states with poor quality Medicaid data | 4,966,494     | -113,910   | 2.2%       | AR, ID, MS, NH, RI |
|                                                         | Restrict to ≥ 1 enrollee in each ADRD strata   | 4,795,167     | -171,327   | 3.5%       | WY                 |
| SUD                                                     | Exclude FFS/MA enrollees in 2016-2017          | 4,294,887     | -1,213,683 | 22.0%      | RI                 |
|                                                         | Restrict to ≥ 1 enrollee in each SUD strata    | 4,157,884     | -137,003   | 3.2%       |                    |
| Region, rurality, social deprivation                    | Restrict to ≥ 1 enrollee per ZCTA              | 5,448,499     | -60,071    | 1.1%       | ~none              |
| LTSS                                                    | Exclude states with poor quality Medicaid data | 5,378,714     | -129,856   | 2.4%       | AR, ID, MS, NH, RI |
|                                                         | Restrict to ≥ 1 enrollee in each LTSS strata   | 4,877,522     | -501,192   | 9.3%       | WY                 |
| Mental health                                           | Exclude FFS/MA enrollees in 2016-2017          | 4,294,887     | -1,213,683 | 22.0%      | RI                 |



|                            |                                                 |           |            |       |                    |
|----------------------------|-------------------------------------------------|-----------|------------|-------|--------------------|
|                            | Restrict to $\geq 1$ enrollee in each MH strata | 4,123,699 | -171,188   | 4.0%  |                    |
| Race/ethnicity             | Restrict to $\geq 1$ enrollee in each strata    | 3,805,510 | -1,703,060 | 30.9% | AR, ID, NE, RI, WY |
| Exclude Incomplete MA Data | Exclude poor quality MA contracts               | 4,539,656 | -968,914   | 17.5% | ~none              |
|                            | Restrict to $\geq 1$ enrollee per ZCTA          | 4,480,132 | -59,524    | 1.3%  |                    |

ADRD: Alzheimer's dementia and related disorders; FFS: Fee-for-service; MA: Medicare Advantage; LTSS: Long-term services and supports; SUD: Substance use disorder; ZCTA: Zip code tabulation area

eTable 5. Zip code tabulation area (ZCTA)-level descriptive statistics, 2016-2019

|                                                    | ZCTAs (States) | Population size <sup>a</sup> | Mean Proportion Across ZCTAs (SD) |             |             |             |
|----------------------------------------------------|----------------|------------------------------|-----------------------------------|-------------|-------------|-------------|
|                                                    |                |                              | Female                            | 65-74 years | 75-84 years | ≥ 85 years  |
| <b>Main analysis</b>                               | 28,404 (51)    | 5,448,499                    | 0.66 (0.07)                       | 0.48 (0.10) | 0.32 (0.06) | 0.20 (0.08) |
| <b>Subgroup</b>                                    |                |                              |                                   |             |             |             |
| <i>Alzheimer's or Related Dementia<sup>b</sup></i> |                |                              |                                   |             |             |             |
| No                                                 | 17,420 (45)    | 4,212,655                    | 0.65 (0.06)                       | 0.55 (0.09) | 0.32 (0.06) | 0.14 (0.06) |
| Yes                                                | 17,420 (45)    | 940,356                      | 0.71 (0.11)                       | 0.21 (0.11) | 0.36 (0.11) | 0.43 (0.14) |
| <i>Substance Use Disorder<sup>c</sup></i>          |                |                              |                                   |             |             |             |
| No                                                 | 18,751 (50)    | 3,893,606                    | 0.67 (0.06)                       | 0.47 (0.09) | 0.32 (0.05) | 0.20 (0.08) |
| Yes                                                | 18,751 (50)    | 377,382                      | 0.52 (0.16)                       | 0.65 (0.17) | 0.26 (0.13) | 0.09 (0.10) |
| <i>Rurality</i>                                    |                |                              |                                   |             |             |             |
| Rural                                              | 11,651 (49)    | 896,554                      | 0.67 (0.09)                       | 0.48 (0.11) | 0.30 (0.08) | 0.22 (0.10) |
| Urban                                              | 16,831 (51)    | 4,569,766                    | 0.66 (0.06)                       | 0.48 (0.10) | 0.32 (0.05) | 0.20 (0.08) |
| <i>Social Deprivation Index<sup>d</sup></i>        |                |                              |                                   |             |             |             |
| Higher Deprivation                                 | 5,047 (50)     | 2,705,939                    | 0.64 (0.05)                       | 0.51 (0.08) | 0.32 (0.05) | 0.17 (0.05) |
| Lower Deprivation                                  | 23,276 (51)    | 2,844,219                    | 0.68 (0.07)                       | 0.45 (0.11) | 0.32 (0.07) | 0.23 (0.09) |
| <i>Long-term Services and Supports Use</i>         |                |                              |                                   |             |             |             |
| None                                               | 14,186 (45)    | 3,653,450                    | 0.64 (0.07)                       | 0.55 (0.10) | 0.31 (0.06) | 0.14 (0.07) |
| Home and Community-based Services                  | 14,186 (45)    | 1,383,067                    | 0.70 (0.08)                       | 0.38 (0.14) | 0.37 (0.08) | 0.26 (0.10) |
| Nursing facility                                   | 14,186 (45)    | 647,239                      | 0.71 (0.12)                       | 0.24 (0.13) | 0.32 (0.11) | 0.45 (0.16) |
| <i>Mental Health<sup>e</sup></i>                   |                |                              |                                   |             |             |             |
| None                                               | 17,352 (50)    | 2,649,760                    | 0.61 (0.07)                       | 0.49 (0.10) | 0.32 (0.06) | 0.19 (0.07) |
| Mild/Moderate                                      | 17,352 (50)    | 1,452,470                    | 0.74 (0.07)                       | 0.44 (0.12) | 0.32 (0.07) | 0.23 (0.10) |
| Severe                                             | 17,352 (50)    | 342,403                      | 0.67 (0.14)                       | 0.60 (0.17) | 0.28 (0.13) | 0.12 (0.11) |
| <i>Race/ethnicity<sup>f</sup></i>                  |                |                              |                                   |             |             |             |
| Asian/Pacific Islander                             | 6,673 (46)     | 571,062                      | 0.60 (0.07)                       | 0.43 (0.11) | 0.38 (0.08) | 0.20 (0.08) |
| Black                                              | 6,673 (46)     | 694,195                      | 0.67 (0.09)                       | 0.54 (0.11) | 0.30 (0.07) | 0.16 (0.07) |
| Hispanic                                           | 6,673 (46)     | 1,060,760                    | 0.65 (0.07)                       | 0.49 (0.09) | 0.35 (0.06) | 0.16 (0.06) |
| Non-Hispanic White                                 | 6,673 (46)     | 1,481,159                    | 0.67 (0.07)                       | 0.46 (0.12) | 0.30 (0.06) | 0.24 (0.10) |
| <i>US Region<sup>g</sup></i>                       |                |                              |                                   |             |             |             |
| Northeast                                          | 5,968 (12)     | 1,381,295                    | 0.66 (0.06)                       | 0.46 (0.10) | 0.32 (0.05) | 0.22 (0.09) |
| Northern Rockies                                   | 886 (5)        | 41,953                       | 0.69 (0.10)                       | 0.45 (0.15) | 0.28 (0.09) | 0.27 (0.14) |
| Northwest                                          | 1,057 (4)      | 144,977                      | 0.65 (0.07)                       | 0.49 (0.10) | 0.33 (0.07) | 0.18 (0.08) |
| Ohio Valley                                        | 5,916 (7)      | 725,518                      | 0.68 (0.07)                       | 0.49 (0.10) | 0.30 (0.06) | 0.21 (0.09) |
| South                                              | 3,853 (6)      | 561,799                      | 0.68 (0.07)                       | 0.45 (0.09) | 0.33 (0.06) | 0.21 (0.07) |
| Southeast                                          | 4,268 (6)      | 865,887                      | 0.69 (0.06)                       | 0.46 (0.09) | 0.33 (0.06) | 0.21 (0.07) |

|                                   |             |           |             |             |             |             |
|-----------------------------------|-------------|-----------|-------------|-------------|-------------|-------------|
| Southwest                         | 1,297 (4)   | 209,888   | 0.63 (0.07) | 0.56 (0.09) | 0.29 (0.06) | 0.15 (0.07) |
| Upper Midwest                     | 3,294 (4)   | 339,002   | 0.68 (0.08) | 0.51 (0.13) | 0.28 (0.07) | 0.21 (0.12) |
| West                              | 1,865 (3)   | 1,184,172 | 0.61 (0.05) | 0.50 (0.08) | 0.33 (0.04) | 0.17 (0.05) |
| <i>Exclude Incomplete MA Data</i> | 27,912 (51) | 4,480,132 | 0.66 (0.07) | 0.47 (0.11) | 0.32 (0.07) | 0.21 (0.09) |

<sup>a</sup> Individuals may belong to more than one strata over the course of the study

<sup>b</sup> Analytic years for this analysis included Medicare Fee-for-Service (FFS) 2016-2019 and Medicare Advantage 2018-2019.

<sup>c</sup> Analytic years for this analysis included Medicare FFS and Medicare Advantage 2018-2019.

<sup>d</sup> ZCTAs were categorized as higher deprivation (above) or lower deprivation (below) based on the Social Deprivation Index score national median.

<sup>e</sup> Analytic years for this analysis included Medicare FFS and Medicare Advantage 2018-2019.

<sup>f</sup> For a ZCTA to be included in the study it must have had at least 1 resident from each racial/ethnic category in all year study years; sample size constraints restricted the number of racial/ethnic categories we could include in our analysis.

<sup>g</sup> Northeast: CT, DC, DE, MA, MD, ME, NH, NJ, NY, PA, VT; Northern Rockies: MT, ND, SD; Northwest: AK, OR, WA; Ohio Valley: IL, IN, KY, MO, OH, TN, WV; South: AR, KS, LA, MS, OK, TX; Southeast: AL, FL, GA, NC, SC, VA; Southwest: AZ, CO, NM, UT; Upper Midwest: IA, MI, MN, WI; West: CA, HI, NV

eFigure 3. Association between lagged heatwaves and adverse health events among dual-eligible enrollees, 2016-2019

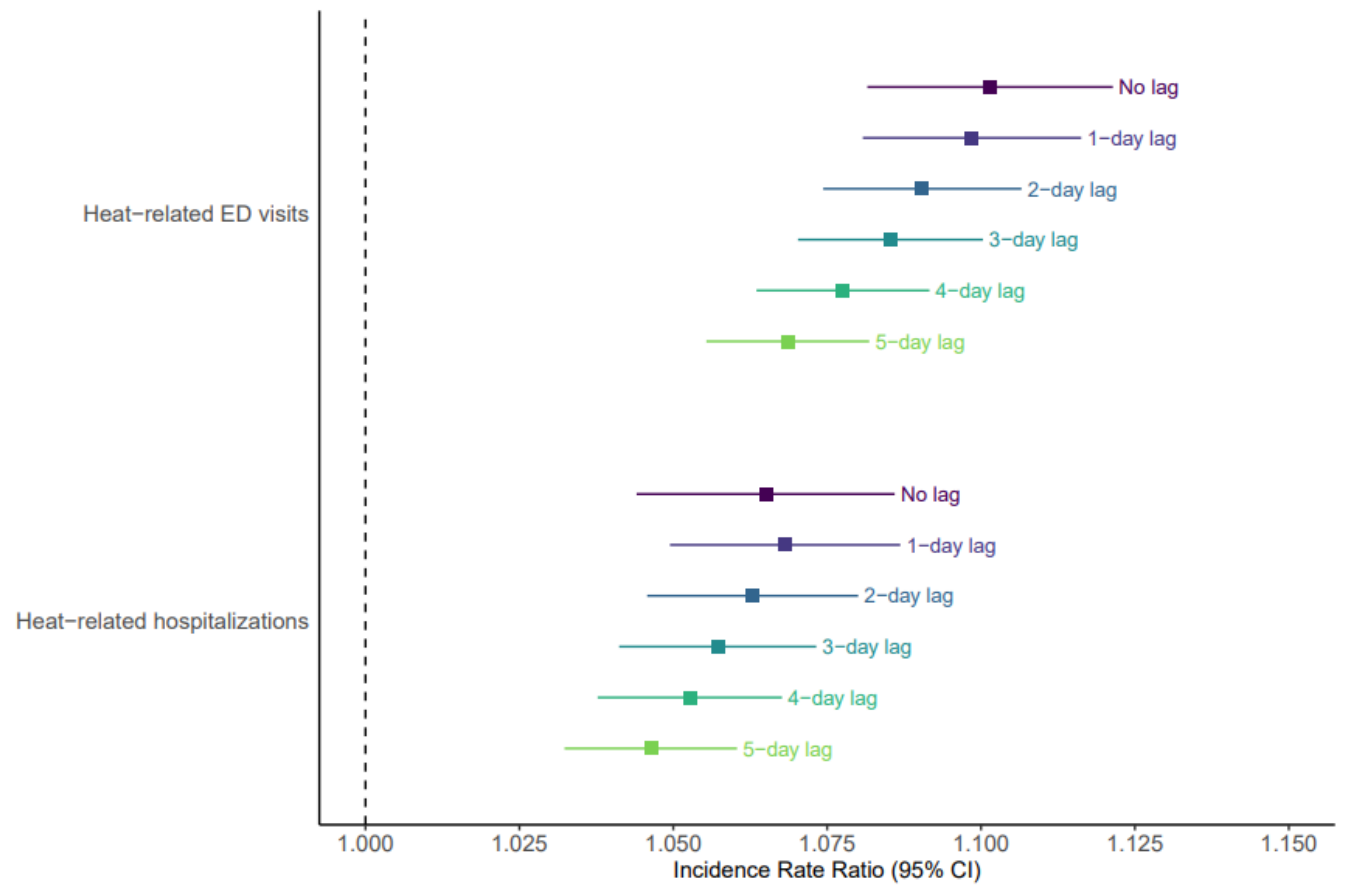

## eReferences

1. National Committee for Quality Assurance. HEDIS 2016 Volume 2 (epub). Accessed July 13, 2023. <https://store.ncqa.org/hedis-2016-volume-2-epub.html>
2. Owens P, Barrett M, McDermott K. Emergency Department Visits for Diagnoses Directly Indicating Heat Exposure: Variation Across Counties in the United States, 2016–2020. *Agency for Healthcare Research and Quality Healthcare Cost and Utilization Project*. Published online December 8, 2022. <https://hcup-us.ahrq.gov/reports/ataglance/HCUpanalysisHeatExposureEDvsts.pdf>.
3. Nori-Sarma A, Milando C, Weinberger KR, Hess JJ, Errett NA, Wellenius GA. Association Between the 2021 Heat Wave in Portland, Oregon, and Seattle, Washington, and Emergency Department Visits. *JAMA*. 2022;328(23):2360-2362. doi:10.1001/jama.2022.20665
4. Rosner B. *Fundamentals of Biostatistics*. 8th ed. Cengage Learning; 2015. Accessed April 24, 2024. <https://www.cengage.com/c/fundamentals-of-biostatistics-8e-rosner/9781305268920/>
5. Center for Medicare & Medicaid Services. DQ Atlas. Accessed February 2, 2022. <https://www.medicare.gov/dq-atlas/welcome>
6. Clinical Classifications Software Refined (CCSR) for ICD-10-CM Diagnoses. Accessed April 1, 2022. <https://www.hcup-us.ahrq.gov/toolssoftware/ccsr/dxccsr.jsp>
7. ResDAC. Research Triangle Institute (RTI) Race Code. 2023. <https://resdac.org/cms-data/variables/research-triangle-institute-rti-race-code>
8. Jarrín OF, Nyandegé AN, Grafova IB, Dong X, Lin H. Validity of Race and Ethnicity Codes in Medicare Administrative Data Compared With Gold-standard Self-reported Race Collected During Routine Home Health Care Visits. *Medical Care*. 2020;58(1):e1-e8. doi:10.1097/MLR.0000000000001216
9. U.S. Climate Regions | Geographical Reference Maps | National Centers for Environmental Information (NCEI). Accessed April 10, 2024. <https://www.ncei.noaa.gov/access/monitoring/reference-maps/us-climate-regions>
10. Karl T, Koss WJ. *Regional and National Monthly, Seasonal, and Annual Temperature Weighted by Area, 1895-1983*. National Climatic Data Center (U.S.); 1984.
11. Patterson D, Andrilla H. WWAMI Rural Health Research Center: Rural Urban Commuting Area Codes Data. Accessed April 10, 2024. <https://depts.washington.edu/uwruca/ruca-uses.php>
12. Social Deprivation Index (SDI). Accessed September 27, 2021. <https://www.graham-center.org/rgc/maps-data-tools/sdi/social-deprivation-index.html>
13. Other Chronic Health, Mental Health, and Potentially Disabling Conditions. Chronic Conditions Data Warehouse. Accessed April 10, 2024. <https://www2.ccwdata.org/condition-categories-other>
14. Greener E, Carpenter A, Nolan L. *Identifying Home and Community-Based Services and the Enrollees Who Use Them in the TAF*. CMS; 2023.

15. Hula L, Parker J, Proctor K, Galecki J, Fokar A. *Assigning TAF Records to a Federally Assigned Service Category*. CMS; 2021. <https://www.medicaid.gov/dq-atlas/landing/resources/downloads>
