# Supplementary material for: Heat Waves and Adverse Health Events Among Dually Eligible Individuals 65 Years and Older
Source: PubMed Central journal article supplement (PMC11549656; doi:10.1001/jamahealthforum.2024.3884), 2024-11-08
Supplement: jamahealthforum-e243884-s002.pdf [file jamahealthforum-e243884-s002.pdf]

## Data Sharing Statement

Kim. Heat Waves and Adverse Health Events Among Dually Eligible Individuals 65 Years and Older. *JAMA Health Forum*. Published November 08, 2024.

doi:10.1001/jamahealthforum.2024.3884

### Data

**Data available:** No

### Additional Information

**Explanation for why data not available:** Our data sources are not allowed to be shared per CMS rule
